# Supplementary material for: Sedimentary protolith and high-P metamorphism of oxidized manganiferous quartzite from the Lanterman Range, northern Victoria Land, Antarctica
Source: Copernicus journal article supplement (doi:10.5194/ejm-36-323-2024), 2024-03-27
Supplement: Supplementary file 1 [file ejm-36-323-2024-supplement.zip]

Archive with 4 entries (4 files):
- Table S3.pdf
- ejm-36-323-2024-supplement-title-page.pdf
- Table S2.pdf
- Table S1.pdf
