# Supplementary material for: Sedimentary protolith and high-P metamorphism of oxidized manganiferous quartzite from the Lanterman Range, northern Victoria Land, Antarctica
Source: Copernicus journal article supplement (doi:10.5194/ejm-36-323-2024), 2024-03-27
Supplement: Supplementary file 1 [file ejm-36-323-2024-supplement.zip › ejm-36-323-2024-supplement-title-page.pdf]

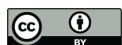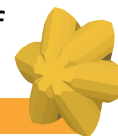

*Supplement of*

**Sedimentary protolith and high-*P* metamorphism of oxidized  
manganiferous quartzite from the Lanterman Range,  
northern Victoria Land, Antarctica**

**Taehwan Kim et al.**

*Correspondence to:* Taehwan Kim ([taehwan.kim@knue.ac.kr](mailto:taehwan.kim@knue.ac.kr))

- [ejm-36-323-2024-supplement-title-page.pdf](#)
- [Table S1.pdf](#)
- [Table S2.pdf](#)
- [Table S3.pdf](#)

The copyright of individual parts of the supplement might differ from the article licence.
