# Supplementary material for: Sedimentary protolith and high-P metamorphism of oxidized manganiferous quartzite from the Lanterman Range, northern Victoria Land, Antarctica
Source: Copernicus journal article supplement (doi:10.5194/ejm-36-323-2024), 2024-03-27
Supplement: Supplementary file 1 [file ejm-36-323-2024-supplement.zip › Table S1.pdf]

Table S1. Representative analyses of minerals in manganese quartzite (sample 23-1F).

| mineral                        | Garnet   |       |          |        |           |       |           |        |            |        |            |       |
|--------------------------------|----------|-------|----------|--------|-----------|-------|-----------|--------|------------|--------|------------|-------|
|                                | Grt I id |       | Grt I od |        | Grt II id |       | Grt II od |        | Grt III id |        | Grt III od |       |
| SiO <sub>2</sub>               | 38.57    | 38.45 | 37.65    | 38.18  | 38.71     | 38.84 | 37.52     | 37.88  | 38.32      | 38.77  | 38.46      | 37.94 |
| TiO <sub>2</sub>               | 0.37     | 0.02  | 0.00     | 0.14   | 0.01      | 0.11  | 0.04      | 0.07   | 0.03       | 0.08   | 0.04       | 0.09  |
| Al <sub>2</sub> O <sub>3</sub> | 21.58    | 21.71 | 21.30    | 21.51  | 21.85     | 21.97 | 21.19     | 21.42  | 21.53      | 21.83  | 21.76      | 21.38 |
| Cr <sub>2</sub> O <sub>3</sub> | b.d.     | 0.02  | b.d.     | b.d.   | 0.03      | b.d.  | b.d.      | b.d.   | b.d.       | b.d.   | 0.03       | 0.04  |
| FeO*                           | 1.44     | 0.87  | 6.72     | 8.65   | 1.18      | 1.25  | 7.97      | 11.85  | 4.05       | 5.60   | 12.45      | 11.33 |
| MnO                            | 28.41    | 27.53 | 25.58    | 25.23  | 29.40     | 29.03 | 25.69     | 25.10  | 25.45      | 25.97  | 23.18      | 23.41 |
| MgO                            | 5.87     | 6.65  | 3.16     | 3.09   | 6.01      | 5.87  | 3.17      | 1.89   | 5.88       | 5.11   | 2.50       | 2.42  |
| CaO                            | 4.20     | 4.40  | 5.42     | 4.43   | 3.78      | 4.10  | 4.03      | 3.68   | 4.33       | 4.16   | 4.47       | 4.63  |
| Na <sub>2</sub> O              | 0.05     | 0.02  | 0.02     | 0.01   | b.d.      | 0.08  | 0.03      | b.d.   | 0.06       | b.d.   | 0.04       | b.d.  |
| K <sub>2</sub> O               | b.d.     | b.d.  | 0.01     | b.d.   | b.d.      | b.d.  | b.d.      | 0.01   | b.d.       | b.d.   | b.d.       | 0.02  |
| Total                          | 99.77    | 99.67 | 100.23   | 100.34 | 100.07    | 99.71 | 99.65     | 100.00 | 99.65      | 100.02 | 100.44     | 99.46 |
| <i>Cations per 12 oxygens</i>  |          |       |          |        |           |       |           |        |            |        |            |       |
| Si                             | 3.00     | 3.00  | 3.00     | 3.00   | 3.00      | 3.00  | 3.00      | 3.00   | 3.00       | 3.00   | 3.00       | 3.00  |
| Al                             | 1.98     | 1.99  | 2.00     | 1.99   | 1.99      | 2.00  | 2.00      | 2.00   | 1.99       | 1.99   | 2.00       | 1.99  |
| Cr                             | b.d.     | 0.00  | b.d.     | b.d.   | 0.00      | b.d.  | b.d.      | b.d.   | b.d.       | b.d.   | 0.00       | 0.00  |
| Ti                             | 0.02     | 0.00  | 0.00     | 0.01   | 0.00      | 0.01  | 0.00      | 0.00   | 0.00       | 0.00   | 0.00       | 0.01  |
| Fe <sup>2+</sup>               | 0.09     | 0.06  | 0.45     | 0.57   | 0.08      | 0.08  | 0.53      | 0.78   | 0.27       | 0.36   | 0.81       | 0.75  |
| Mn                             | 1.87     | 1.82  | 1.72     | 1.68   | 1.93      | 1.90  | 1.74      | 1.68   | 1.69       | 1.70   | 1.53       | 1.57  |
| Mg                             | 0.68     | 0.77  | 0.38     | 0.36   | 0.69      | 0.68  | 0.38      | 0.22   | 0.69       | 0.59   | 0.29       | 0.29  |
| Ca                             | 0.35     | 0.37  | 0.46     | 0.37   | 0.31      | 0.34  | 0.34      | 0.31   | 0.36       | 0.35   | 0.37       | 0.39  |
| Na                             | 0.01     | 0.00  | 0.00     | 0.00   | b.d.      | 0.01  | 0.00      | b.d.   | 0.01       | b.d.   | 0.01       | b.d.  |
| K                              | b.d.     | b.d.  | 0.00     | b.d.   | b.d.      | b.d.  | b.d.      | 0.00   | b.d.       | b.d.   | b.d.       | 0.00  |
| Total                          | 8.00     | 8.01  | 8.01     | 7.99   | 8.00      | 8.00  | 8.00      | 8.00   | 8.01       | 8.00   | 8.01       | 8.00  |
| X <sub>Fe</sub>                | 0.12     | 0.07  | 0.54     | 0.61   | 0.10      | 0.11  | 0.58      | 0.78   | 0.28       | 0.38   | 0.74       | 0.72  |
| Alm                            | 0.03     | 0.02  | 0.15     | 0.19   | 0.03      | 0.03  | 0.18      | 0.26   | 0.09       | 0.12   | 0.27       | 0.25  |
| Prp                            | 0.23     | 0.26  | 0.12     | 0.12   | 0.23      | 0.23  | 0.13      | 0.07   | 0.23       | 0.20   | 0.10       | 0.10  |
| Grs                            | 0.12     | 0.12  | 0.15     | 0.13   | 0.10      | 0.11  | 0.12      | 0.10   | 0.12       | 0.12   | 0.12       | 0.13  |
| Sps                            | 0.62     | 0.60  | 0.57     | 0.56   | 0.64      | 0.63  | 0.58      | 0.56   | 0.56       | 0.57   | 0.51       | 0.52  |

\*Total Fe as FeO.

b.d., below detection limit; id, inner domain; od, outer domain; X<sub>Fe</sub> = Fe<sup>2+</sup>/(Fe<sup>2+</sup> + Mg); Alm = Fe<sup>2+</sup>/M, Prp = Mg/M, Grs = Ca/M, and Sps = Mn/M, where M = (Fe<sup>2+</sup> + Mg + Ca + Mn).

Table S1. Continued.

| mineral                         | Epidote-group mineral |         |                     |       |                  |       |         |       |
|---------------------------------|-----------------------|---------|---------------------|-------|------------------|-------|---------|-------|
|                                 | core                  |         | inner mantle        |       | outer mantle     |       | rim     |       |
|                                 | piemontite            | epidote | REE-rich piemontite |       | REE-rich epidote |       | epidote |       |
| SiO <sub>2</sub>                | 37.86                 | 38.09   | 36.32               | 36.38 | 35.67            | 35.39 | 38.07   | 38.00 |
| TiO <sub>2</sub>                | 0.02                  | b.d.    | 0.02                | 0.02  | 0.05             | 0.05  | b.d.    | 0.02  |
| Al <sub>2</sub> O <sub>3</sub>  | 23.28                 | 22.64   | 20.09               | 20.37 | 20.48            | 20.14 | 22.24   | 22.81 |
| Cr <sub>2</sub> O <sub>3</sub>  | b.d.                  | b.d.    | b.d.                | b.d.  | b.d.             | b.d.  | b.d.    | b.d.  |
| FeO*                            | 6.10                  | 9.67    | 5.97                | 6.27  | 7.21             | 7.58  | 11.85   | 10.63 |
| MnO                             | 7.47                  | 5.02    | 9.17                | 8.82  | 5.37             | 3.53  | 1.32    | 1.33  |
| MgO                             | 0.22                  | 0.22    | 1.31                | 1.15  | 1.92             | 2.10  | 0.23    | 0.32  |
| CaO                             | 20.20                 | 19.96   | 16.61               | 16.93 | 15.09            | 14.69 | 21.59   | 21.64 |
| Na <sub>2</sub> O               | b.d.                  | 0.02    | b.d.                | b.d.  | 0.12             | 0.40  | 0.08    | 0.01  |
| SrO                             | 0.76                  | 0.87    | 0.36                | 0.36  | 0.41             | 0.23  | 0.20    | b.d.  |
| La <sub>2</sub> O <sub>3</sub>  | 0.29                  | 0.06    | 0.97                | 0.72  | 1.57             | 1.56  | 0.32    | 0.51  |
| Ce <sub>2</sub> O <sub>3</sub>  | 0.42                  | 0.39    | 5.32                | 4.35  | 6.98             | 8.72  | 1.47    | 1.73  |
| Pr <sub>2</sub> O <sub>3</sub>  | b.d.                  | b.d.    | 0.21                | 0.15  | 0.35             | 0.45  | 0.05    | 0.10  |
| Nd <sub>2</sub> O <sub>3</sub>  | 0.10                  | 0.10    | 0.81                | 1.00  | 1.60             | 1.64  | 0.34    | 0.35  |
| Sm <sub>2</sub> O <sub>3</sub>  | b.d.                  | b.d.    | b.d.                | 0.05  | b.d.             | b.d.  | b.d.    | b.d.  |
| Gd <sub>2</sub> O <sub>3</sub>  | b.d.                  | b.d.    | 0.09                | 0.05  | b.d.             | 0.13  | 0.08    | b.d.  |
| Y <sub>2</sub> O <sub>3</sub>   | 0.04                  | 0.03    | b.d.                | b.d.  | 0.03             | b.d.  | b.d.    | b.d.  |
| UO <sub>2</sub>                 | b.d.                  | b.d.    | b.d.                | b.d.  | b.d.             | b.d.  | b.d.    | b.d.  |
| ThO <sub>2</sub>                | 0.02                  | 0.03    | 0.24                | 0.14  | 0.36             | 0.34  | 0.06    | 0.12  |
| PbO                             | 0.31                  | 0.26    | 0.25                | 0.15  | 0.14             | 0.16  | 0.12    | 0.10  |
| Total                           | 97.13                 | 97.36   | 97.75               | 96.92 | 97.34            | 97.14 | 98.03   | 97.71 |
| <i>Cations per 12.5 oxygens</i> |                       |         |                     |       |                  |       |         |       |
| Si                              | 3.01                  | 3.03    | 3.00                | 3.00  | 3.00             | 3.01  | 3.03    | 3.03  |
| Al <sup>VI</sup>                | 2.18                  | 2.12    | 1.95                | 1.98  | 2.03             | 2.02  | 2.09    | 2.15  |
| Cr                              | b.d.                  | b.d.    | b.d.                | b.d.  | b.d.             | b.d.  | b.d.    | b.d.  |
| Ti                              | 0.00                  | b.d.    | 0.00                | 0.00  | 0.00             | 0.00  | b.d.    | 0.00  |
| Fe <sup>3+</sup>                | 0.41                  | 0.64    | 0.41                | 0.43  | 0.51             | 0.54  | 0.79    | 0.71  |
| Mn <sup>3+</sup>                | 0.50                  | 0.34    | 0.64                | 0.62  | 0.38             | 0.25  | 0.09    | 0.09  |
| Mg                              | 0.03                  | 0.03    | 0.16                | 0.14  | 0.24             | 0.27  | 0.03    | 0.04  |
| Ca                              | 1.72                  | 1.70    | 1.47                | 1.50  | 1.36             | 1.34  | 1.84    | 1.85  |
| Na                              | b.d.                  | 0.00    | b.d.                | b.d.  | 0.02             | 0.07  | 0.01    | 0.00  |
| Sr                              | 0.04                  | 0.04    | 0.02                | 0.02  | 0.02             | 0.01  | 0.01    | b.d.  |
| La                              | 0.01                  | 0.00    | 0.03                | 0.02  | 0.05             | 0.05  | 0.01    | 0.02  |
| Ce                              | 0.01                  | 0.01    | 0.16                | 0.13  | 0.22             | 0.27  | 0.04    | 0.05  |
| Pr                              | b.d.                  | b.d.    | 0.01                | 0.01  | 0.01             | 0.01  | 0.00    | 0.00  |
| Nd                              | 0.00                  | 0.00    | 0.02                | 0.03  | 0.05             | 0.05  | 0.01    | 0.01  |
| Sm                              | b.d.                  | b.d.    | b.d.                | b.d.  | b.d.             | b.d.  | b.d.    | b.d.  |
| Gd                              | b.d.                  | b.d.    | 0.00                | 0.00  | b.d.             | 0.00  | 0.00    | b.d.  |
| Y                               | 0.00                  | 0.00    | b.d.                | b.d.  | 0.00             | b.d.  | b.d.    | b.d.  |
| U                               | b.d.                  | b.d.    | b.d.                | 0.00  | b.d.             | b.d.  | b.d.    | 0.00  |
| Th                              | 0.00                  | 0.00    | 0.01                | 0.00  | 0.01             | 0.01  | 0.00    | 0.00  |
| Pb                              | 0.01                  | 0.01    | 0.01                | 0.00  | 0.00             | 0.00  | 0.00    | 0.00  |
| Total                           | 7.93                  | 7.92    | 7.88                | 7.88  | 7.88             | 7.91  | 7.96    | 7.95  |
| REY                             | 0.03                  | 0.02    | 0.22                | 0.19  | 0.32             | 0.39  | 0.07    | 0.08  |
| Czo                             | 0.17                  | 0.11    | 0.00                | 0.00  | 0.03             | 0.02  | 0.09    | 0.15  |
| Ep                              | 0.37                  | 0.58    | 0.39                | 0.41  | 0.55             | 0.66  | 0.82    | 0.75  |
| Pmt                             | 0.46                  | 0.31    | 0.61                | 0.59  | 0.42             | 0.31  | 0.09    | 0.10  |

\*Total Fe as FeO.

b.d., below detection limit; Czo = (Al<sup>VI</sup> - 2)/M, Ep = Fe<sup>3+</sup>/M, Pmt = Mn<sup>3+</sup>/M, where M = (Fe<sup>3+</sup> + Mn<sup>3+</sup> + Al<sup>VI</sup> - 2).

Table S1. Continued.

| mineral                                                                                                                                     | Phengite |       | Tephroite | Chlorite |       | Plagioclase | K-feldspar | Titanohematite |                                   | Ilmenite | Pyrophanite |       |       |       |
|---------------------------------------------------------------------------------------------------------------------------------------------|----------|-------|-----------|----------|-------|-------------|------------|----------------|-----------------------------------|----------|-------------|-------|-------|-------|
|                                                                                                                                             | inner    | outer |           |          |       |             |            |                |                                   |          |             |       |       |       |
| SiO <sub>2</sub>                                                                                                                            | 49.48    | 48.04 | 47.80     | 29.12    | 28.57 | 27.00       | 67.10      | 64.13          | SiO <sub>2</sub>                  | 0.06     | 0.07        | 0.06  | 0.04  | 0.09  |
| TiO <sub>2</sub>                                                                                                                            | 0.47     | 0.86  | 0.28      | 0.21     | b.d.  | 0.12        | b.d.       | 0.02           | TiO <sub>2</sub>                  | 7.41     | 6.12        | 44.00 | 48.19 | 37.73 |
| Al <sub>2</sub> O <sub>3</sub>                                                                                                              | 27.14    | 29.13 | 28.10     | b.d.     | 20.04 | 21.10       | 20.73      | 18.61          | Al <sub>2</sub> O <sub>3</sub>    | 0.15     | 0.05        | 0.10  | 0.06  | 0.04  |
| Cr <sub>2</sub> O <sub>3</sub>                                                                                                              | 0.02     | 0.04  | b.d.      | b.d.     | 0.03  | b.d.        | b.d.       | b.d.           | Cr <sub>2</sub> O <sub>3</sub>    | b.d.     | b.d.        | b.d.  | 0.01  | 0.01  |
| FeO*                                                                                                                                        | 3.96     | 3.48  | 4.78      | 1.10     | 10.50 | 14.32       | 0.06       | 0.01           | Fe <sub>2</sub> O <sub>3</sub> ** | 85.35    | 88.40       | 13.91 | 6.73  | 26.16 |
| MnO                                                                                                                                         | 0.01     | 0.07  | 0.22      | 65.52    | 2.37  | 1.68        | 0.03       | b.d.           | FeO**                             | 6.33     | 5.50        | 39.34 | 2.60  | 5.46  |
| MgO                                                                                                                                         | 2.99     | 2.52  | 2.39      | 0.40     | 23.38 | 21.22       | 0.01       | b.d.           | MnO                               | 0.51     | 0.18        | 0.27  | 40.20 | 28.20 |
| CaO                                                                                                                                         | 0.03     | 0.01  | 0.01      | 2.03     | 0.04  | 0.02        | 0.96       | 0.00           | MgO                               | 0.03     | b.d.        | 0.01  | 0.04  | 0.01  |
| Na <sub>2</sub> O                                                                                                                           | 0.65     | 0.59  | 0.15      | b.d.     | 0.03  | 0.02        | 11.04      | 0.20           | CaO                               | b.d.     | b.d.        | 0.02  | 0.01  | b.d.  |
| K <sub>2</sub> O                                                                                                                            | 10.42    | 10.55 | 11.15     | b.d.     | 0.01  | 0.01        | 0.06       | 16.99          | Na <sub>2</sub> O                 | b.d.     | b.d.        | b.d.  | b.d.  | b.d.  |
| Total                                                                                                                                       | 95.15    | 95.30 | 94.88     | 98.38    | 84.97 | 85.49       | 100.00     | 100.04         | K <sub>2</sub> O                  | b.d.     | b.d.        | b.d.  | 0.02  | 0.01  |
|                                                                                                                                             |          |       |           |          |       |             |            |                | Total**                           | 99.84    | 100.27      | 97.72 | 97.91 | 97.72 |
| Cations per 11, 4, 14, 8, and 3 oxygens for phengite, tephroite, chlorite, feldspar, and titanohematite-ilmenite-pyrophanite, respectively. |          |       |           |          |       |             |            |                |                                   |          |             |       |       |       |
| Si                                                                                                                                          | 3.34     | 3.24  | 3.27      | 0.99     | 2.89  | 2.77        | 2.94       | 2.98           | Si                                | 0.00     | 0.00        | 0.00  | 0.00  | 0.00  |
| Al <sup>IV</sup>                                                                                                                            | 0.66     | 0.76  | 0.73      | b.d.     | 1.11  | 1.23        | 0.06       | 0.02           | Ti                                | 0.15     | 0.12        | 0.86  | 0.93  | 0.74  |
| Al <sup>VI</sup>                                                                                                                            | 1.51     | 1.56  | 1.54      | b.d.     | 1.28  | 1.32        | 1.01       | 1.00           | Al                                | 0.00     | 0.00        | 0.00  | 0.00  | 0.00  |
| Cr                                                                                                                                          | 0.00     | 0.00  | b.d.      | b.d.     | 0.00  | b.d.        | b.d.       | b.d.           | Cr                                | b.d.     | b.d.        | b.d.  | 0.00  | 0.00  |
| Ti                                                                                                                                          | 0.02     | 0.04  | 0.01      | 0.01     | b.d.  | 0.01        | b.d.       | 0.00           | Fe <sup>3+</sup>                  | 1.70     | 1.75        | 0.27  | 0.13  | 0.51  |
| Fe <sup>2+</sup>                                                                                                                            | 0.22     | 0.20  | 0.27      | 0.03     | 0.89  | 1.23        | 0.00       | 0.00           | Fe <sup>2+</sup>                  | 0.14     | 0.12        | 0.86  | 0.05  | 0.12  |
| Mn                                                                                                                                          | 0.00     | 0.00  | 0.01      | 1.89     | 0.20  | 0.15        | 0.00       | b.d.           | Mn                                | 0.01     | 0.00        | 0.01  | 0.88  | 0.62  |
| Mg                                                                                                                                          | 0.30     | 0.25  | 0.24      | 0.02     | 3.53  | 3.24        | 0.00       | b.d.           | Mg                                | 0.00     | b.d.        | 0.00  | 0.00  | 0.00  |
| Ca                                                                                                                                          | 0.00     | 0.00  | 0.00      | 0.07     | 0.00  | 0.00        | 0.04       | 0.00           | Ca                                | b.d.     | b.d.        | 0.00  | 0.00  | b.d.  |
| Na                                                                                                                                          | 0.09     | 0.08  | 0.02      | b.d.     | 0.01  | 0.00        | 0.94       | 0.02           | Na                                | b.d.     | b.d.        | b.d.  | b.d.  | b.d.  |
| K                                                                                                                                           | 0.90     | 0.91  | 0.97      | b.d.     | 0.00  | 0.00        | 0.00       | 1.00           | K                                 | b.d.     | b.d.        | b.d.  | 0.00  | 0.00  |
| Total                                                                                                                                       | 7.04     | 7.05  | 7.08      | 3.01     | 9.92  | 9.95        | 5.00       | 5.03           | Total                             | 2.00     | 2.00        | 2.00  | 2.00  | 2.00  |
| X <sub>Fe</sub>                                                                                                                             | 0.43     | 0.44  | 0.53      | 0.61     | 0.20  | 0.27        | -          | -              | Pph                               | 0.01     | 0.00        | 0.01  | 0.88  | 0.62  |
| An                                                                                                                                          | -        | -     | -         | 0.94***  | -     | -           | 0.05       | 0.00           | Ilm                               | 0.14     | 0.12        | 0.86  | 0.05  | 0.12  |
| Ab                                                                                                                                          | -        | -     | -         | -        | -     | -           | 0.95       | 0.02           | Hem                               | 0.85     | 0.88        | 0.13  | 0.07  | 0.26  |
| Or                                                                                                                                          | -        | -     | -         | -        | -     | -           | 0.00       | 0.98           |                                   |          |             |       |       |       |

\*Total Fe as FeO.

\*\*Recalculated after Droop et al. (1987).

\*\*\*Tep = Mn/(Fe + Mg + Ca + Mn) for tephroite.

b.d., below detection limit; X<sub>Fe</sub> = Fe<sup>2+</sup>/(Fe<sup>2+</sup> + Mg); An = Ca/M, Ab = Na/M, and Or = K/M, where M = Ca + Na + K; Pph = Mn, Ilm = Fe<sup>2+</sup>, and Hem = 1 - Pph - Ilm.
