# Supplementary material for: Sedimentary protolith and high-P metamorphism of oxidized manganiferous quartzite from the Lanterman Range, northern Victoria Land, Antarctica
Source: Copernicus journal article supplement (doi:10.5194/ejm-36-323-2024), 2024-03-27
Supplement: Supplementary file 1 [file ejm-36-323-2024-supplement.zip › Table S2.pdf]

Table S2. Bulk-rock geochemistry of the manganeseiferous quartzite and other Mn-rich siliceous metasediments available from the literature.

| Locality                       | Lanternman Range, Antarctica | Otago schist, New Zealand         |                             | Andros Island, Greece      |                  |               | Sanbagawa schist, Japan |                    | Praborna Mn ore, Western Alps | Belgian coticule       |              |          | Meta-exhalite, Venezuela |
|--------------------------------|------------------------------|-----------------------------------|-----------------------------|----------------------------|------------------|---------------|-------------------------|--------------------|-------------------------------|------------------------|--------------|----------|--------------------------|
| Reference                      | this study                   | Coombs et al. (1985)              |                             | Reinecke et al. (1985)     |                  |               | Izadyar et al. (2003)   |                    | Tumiati et al. (2010)         | Herbosch et al. (2016) |              |          | Maresch et al. (2022)    |
|                                |                              | Pink Pmt-bearing quartzose schist | Brown-pink quartzose schist | Pmt- and Pmt-Sps quartzite | Chl-Ms quartzite | Sps quartzite | Tc-bearing Pmt schist   | Tc-free Pmt schist |                               | Coticule               | Cld coticule | Coticule |                          |
| Major elements (wt%)           |                              |                                   |                             |                            |                  |               |                         |                    |                               |                        |              |          |                          |
| SiO <sub>2</sub>               | 86.63                        | 80.31                             | 67.77                       | 78.57                      | 83.20            | 63.08         | 71.88                   | 77.19              | 59.56                         | 59.10                  | 66.60        | 54.51    | 51.21                    |
| TiO <sub>2</sub>               | 0.23                         | 0.33                              | 0.50                        | 0.33                       | 0.31             | 0.46          | 0.12                    | 0.33               | 0.26                          | 1.05                   | 0.48         | 1.06     | 0.52                     |
| Al <sub>2</sub> O <sub>3</sub> | 4.66                         | 7.58                              | 12.37                       | 7.48                       | 6.90             | 9.90          | 7.14                    | 5.76               | 7.92                          | 20.30                  | 11.30        | 22.50    | 14.59                    |
| Fe <sub>2</sub> O <sub>3</sub> | 2.74                         | 4.06                              | 7.21                        | 4.22                       | 4.34             | 7.18          | 5.05                    | 3.00               | 3.79                          | 0.30                   | 3.59         | 2.28     | 21.50                    |
| FeO                            |                              | 0.38                              | 0.11                        |                            |                  |               | 0.11                    | 0.13               |                               | 0.64                   |              |          |                          |
| MnO                            | 1.78                         | 1.38                              | 2.28                        | 1.94                       | 0.23             | 13.57         | 1.65                    | 0.21               | 12.12                         | 9.83                   | 16.60        | 10.65    | 6.23                     |
| MgO                            | 0.70                         | 0.89                              | 1.39                        | 1.76                       | 1.45             | 1.15          | 2.98                    | 2.43               | 1.91                          | 1.40                   | 0.75         | 1.10     | 1.57                     |
| CaO                            | 0.29                         | 1.54                              | 2.84                        | 1.83                       | 0.31             | 2.28          | 2.70                    | 2.87               | 5.18                          | 0.24                   | 0.69         | 0.38     | 3.99                     |
| Na <sub>2</sub> O              | 0.28                         | 0.78                              | 0.97                        | 0.24                       | 0.22             | 1.40          | 1.06                    | 0.96               | 2.78                          | 0.69                   | 0.10         | 0.83     | 0.05                     |
| K <sub>2</sub> O               | 1.25                         | 1.30                              | 2.29                        | 1.70                       | 2.38             | 0.12          | 1.00                    | 0.60               | 0.99                          | 2.60                   | 0.08         | 2.55     | 0.03                     |
| P <sub>2</sub> O <sub>5</sub>  | 0.08                         | 0.03                              | 0.11                        | 0.10                       | 0.09             | 0.11          | 0.20                    | 0.16               | 0.10                          | 0.07                   | 0.06         | 0.11     | 1.28                     |
| LOI                            | 0.90                         | 1.24                              | 1.67                        | 1.33                       | 1.15             | 0.45          | 4.99                    | 5.50               | 1.46                          | 2.50                   |              | 2.95     | -1.24                    |
| Total                          | 99.54                        | 99.82                             | 99.51                       | 99.50                      | 100.58           | 99.70         | 99.18                   | 99.17              | 99.04                         | 98.72                  | 100.25       | 98.91    | 99.78                    |
| Trace elements (ppm)           |                              |                                   |                             |                            |                  |               |                         |                    |                               |                        |              |          |                          |
| Co                             | 87                           |                                   |                             |                            |                  |               |                         |                    | 92                            | 22                     | 13           |          | 42                       |
| Ni                             | 50                           |                                   |                             | 35                         | 21               | 19            | 13                      | 10                 | 113                           | 68                     | 0.5          |          | 36                       |
| Cu                             | < 10                         | 113                               | 252                         | 175                        | 35               | 32            |                         |                    | 40                            | 17                     | 939          |          | 86                       |
| La                             | 8                            |                                   |                             |                            |                  |               |                         |                    | 8.25                          |                        |              | 51.3     | 71.5                     |
| Ce                             | 50.6                         |                                   |                             |                            |                  |               |                         |                    | 19.9                          |                        |              | 115.5    | 173.0                    |
| Pr                             | 1.95                         |                                   |                             |                            |                  |               |                         |                    | 2.01                          |                        |              | 13.13    | 21.01                    |
| Nd                             | 7.5                          |                                   |                             |                            |                  |               |                         |                    | 8.01                          |                        |              | 45.5     | 89.7                     |
| Sm                             | 1.8                          |                                   |                             |                            |                  |               |                         |                    | 1.79                          |                        |              | 10.10    | 22.12                    |
| Eu                             | 0.41                         |                                   |                             |                            |                  |               |                         |                    | 0.48                          |                        |              | 3.29     | 5.05                     |
| Gd                             | 2.1                          |                                   |                             |                            |                  |               |                         |                    | 2.00                          |                        |              | 9.33     | 23.77                    |
| Tb                             | 0.4                          |                                   |                             |                            |                  |               |                         |                    | 0.30                          |                        |              |          | 3.81                     |
| Dy                             | 2.8                          |                                   |                             |                            |                  |               |                         |                    | 1.65                          |                        |              | 8.85     | 22.11                    |
| Y                              | 13                           | 20                                | 38                          | 25                         | 16               | 43            | 18                      | 16                 | 9.32                          | 44                     | 15           |          | 103.7                    |
| Ho                             | 0.6                          |                                   |                             |                            |                  |               |                         |                    | 0.31                          |                        |              | 1.65     | 4.59                     |
| Er                             | 1.6                          |                                   |                             |                            |                  |               |                         |                    | 0.87                          |                        |              | 4.58     | 13.73                    |
| Tm                             | 0.25                         |                                   |                             |                            |                  |               |                         |                    | 0.13                          |                        |              |          | 2.04                     |
| Yb                             | 1.7                          |                                   |                             |                            |                  |               |                         |                    | 0.87                          |                        |              | 4.03     | 14.11                    |
| Lu                             | 0.25                         |                                   |                             |                            |                  |               |                         |                    | 0.14                          |                        |              | 0.59     | 2.35                     |

\*Mineral abbreviations after Whitney and Evans (2010).
