# Supplementary material for: Sedimentary protolith and high-P metamorphism of oxidized manganiferous quartzite from the Lanterman Range, northern Victoria Land, Antarctica
Source: Copernicus journal article supplement (doi:10.5194/ejm-36-323-2024), 2024-03-27
Supplement: Supplementary file 1 [file ejm-36-323-2024-supplement.zip › Table S3.pdf]

Table S3. The SHRIMP U–Th–Pb isotopic compositions of zircon from the manganiferous quartzite

| Spot no.            | Texture* | U<br>(ppm) | Th<br>(ppm) | Th/U | Common<br><sup>206</sup> Pb (%) | <sup>207</sup> Pb*/<br><sup>206</sup> Pb* | ± %  | <sup>208</sup> Pb*/<br><sup>206</sup> Pb* | ± % | <sup>206</sup> Pb*/<br><sup>238</sup> U | ± % | <sup>207</sup> Pb/ <sup>206</sup> Pb<br>age (Ma) | <sup>206</sup> Pb/ <sup>238</sup> U<br>age (Ma) | Discord<br>-ance (%) |
|---------------------|----------|------------|-------------|------|---------------------------------|-------------------------------------------|------|-------------------------------------------|-----|-----------------------------------------|-----|--------------------------------------------------|-------------------------------------------------|----------------------|
| <i>Sample 23-1F</i> |          |            |             |      |                                 |                                           |      |                                           |     |                                         |     |                                                  |                                                 |                      |
| 1.1                 | dc       | 600        | 13          | 0.02 | 0.20                            | 0.05655                                   | 1.2  | 0.0077                                    | 56  | 0.0822                                  | 0.9 | 474 ± 26                                         | 510 ± 14                                        | -8                   |
| 2.1                 | dc       | 548        | 246         | 0.46 | 0.63                            | 0.05617                                   | 2.0  | 0.0082                                    | 56  | 0.0880                                  | 0.9 | 459 ± 45                                         | 544 ± 15                                        | -19                  |
| 3.1                 | dc       | 714        | 7           | 0.01 | 0.07                            | 0.05606                                   | 1.0  | 0.0036                                    | 118 | 0.0833                                  | 0.9 | 455 ± 23                                         | 516 ± 14                                        | -14                  |
| 4.1                 | dr       | 949        | 8           | 0.01 | -0.06                           | 0.05729                                   | 1.1  | 0.0064                                    | 77  | 0.0926                                  | 1.0 | 503 ± 24                                         | 571 ± 17                                        | -14                  |
| 5.1                 | dr       | 537        | 26          | 0.05 | 1.59                            | 0.11589                                   | 0.6  | -0.0190                                   | 43  | 0.3025                                  | 1.0 | 1894 ± 10                                        | 1703 ± 47                                       | 10                   |
| 5.2                 | oc       | 340        | 156         | 0.47 | 1.38                            | 0.13428                                   | 0.7  | 0.1223                                    | 9   | 0.3697                                  | 1.2 | 2155 ± 12                                        | 2028 ± 63                                       | 6                    |
| 6.1                 | dr       | 342        | 7           | 0.02 | 0.02                            | 0.05579                                   | 1.2  | 0.0054                                    | 34  | 0.0806                                  | 0.3 | 444 ± 27                                         | 500 ± 4                                         | -13                  |
| 6.2                 | dr       | 528        | 17          | 0.03 | 0.38                            | 0.05735                                   | 2.0  | 0.0052                                    | 63  | 0.0815                                  | 0.3 | 505 ± 45                                         | 505 ± 4                                         | 0                    |
| 7.1                 | dc       | 571        | 4           | 0.01 | -0.05                           | 0.05689                                   | 0.8  | 0.0035                                    | 48  | 0.0831                                  | 0.3 | 487 ± 18                                         | 514 ± 4                                         | -6                   |
| 8.1                 | bc       | 60         | 6           | 0.11 | 0.28                            | 0.05200                                   | 5.3  | 0.0317                                    | 14  | 0.0802                                  | 0.4 | 285 ± 120                                        | 497 ± 6                                         | -76                  |
| 9.1                 | dc       | 329        | 4           | 0.01 | -0.06                           | 0.05634                                   | 1.0  | 0.0063                                    | 29  | 0.0824                                  | 0.3 | 466 ± 23                                         | 510 ± 4                                         | -10                  |
| 10.1                | bc       | 148        | 26          | 0.18 | 3.49                            | 0.07636                                   | 7.6  | 0.0219                                    | 78  | 0.0994                                  | 0.5 | 1104 ± 153                                       | 611 ± 10                                        | 46                   |
| 11.1                | ic       | 121        | 13          | 0.12 | 0.03                            | 0.05463                                   | 2.8  | 0.0410                                    | 11  | 0.0842                                  | 0.7 | 397 ± 60                                         | 521 ± 11                                        | -32                  |
| 12.1                | dc       | 174        | 30          | 0.18 | 7.50                            | 0.16325                                   | 0.6  | -0.1307                                   | 6   | 0.3202                                  | 0.8 | 2490 ± 10                                        | 1791 ± 38                                       | 27                   |
| 13.1                | dc       | 657        | 42          | 0.07 | 0.36                            | 0.05629                                   | 2.5  | 0.0214                                    | 26  | 0.0868                                  | 0.7 | 464 ± 53                                         | 537 ± 12                                        | -16                  |
| 14.1                | dc       | 361        | 6           | 0.02 | -0.04                           | 0.05778                                   | 1.3  | 0.0062                                    | 57  | 0.0817                                  | 0.7 | 521 ± 29                                         | 506 ± 10                                        | 3                    |
| 15.1                | dc       | 942        | 13          | 0.01 | 0.00                            | 0.05685                                   | 0.8  | 0.0031                                    | 108 | 0.0832                                  | 0.7 | 486 ± 17                                         | 515 ± 10                                        | -6                   |
| 16.1                | dr       | 502        | 5           | 0.01 | 0.12                            | 0.05667                                   | 1.3  | 0.0025                                    | 136 | 0.0809                                  | 0.7 | 479 ± 28                                         | 502 ± 10                                        | -5                   |
| 17.1                | oc       | 489        | 101         | 0.21 | -0.01                           | 0.05782                                   | 1.1  | 0.0740                                    | 6   | 0.0883                                  | 0.7 | 523 ± 24                                         | 546 ± 11                                        | -4                   |
| 18.1                | dc       | 767        | 36          | 0.05 | 3.60                            | 0.08673                                   | 1.3  | -0.0499                                   | 9   | 0.0980                                  | 0.7 | 1354 ± 24                                        | 602 ± 13                                        | 57                   |
| 19.1                | dc       | 396        | 663         | 1.73 | 1.88                            | 0.05756                                   | 5.1  | 0.0190                                    | 38  | 0.0796                                  | 0.7 | 513 ± 93                                         | 494 ± 11                                        | 4                    |
| 20.1                | dc       | 614        | 7           | 0.01 | 0.28                            | 0.05776                                   | 1.2  | 0.0041                                    | 82  | 0.0819                                  | 0.7 | 521 ± 26                                         | 507 ± 10                                        | 3                    |
| 21.1                | dc       | 371        | 9           | 0.03 | 0.04                            | 0.05780                                   | 1.2  | 0.0076                                    | 50  | 0.0802                                  | 0.7 | 522 ± 26                                         | 498 ± 11                                        | 5                    |
| 22.1                | dc       | 325        | 4           | 0.01 | 0.26                            | 0.05925                                   | 1.2  | -0.0015                                   | 252 | 0.0819                                  | 0.7 | 576 ± 27                                         | 507 ± 10                                        | 12                   |
| 23.1                | dc       | 561        | 20          | 0.04 | 0.41                            | 0.05803                                   | 1.4  | 0.0038                                    | 115 | 0.0801                                  | 0.9 | 531 ± 30                                         | 497 ± 13                                        | 7                    |
| 24.1                | dr       | 644        | 43          | 0.07 | 0.52                            | 0.05848                                   | 1.8  | 0.0253                                    | 16  | 0.0912                                  | 0.7 | 548 ± 39                                         | 563 ± 11                                        | -3                   |
| 25.1                | dc       | 611        | 11          | 0.02 | 0.59                            | 0.05786                                   | 1.6  | 0.0024                                    | 147 | 0.0782                                  | 0.7 | 524 ± 33                                         | 485 ± 10                                        | 8                    |
| 26.1                | ic       | 293        | 81          | 0.28 | 1.88                            | 0.07380                                   | 1.7  | 0.0606                                    | 12  | 0.1184                                  | 1.1 | 1036 ± 33                                        | 721 ± 24                                        | 31                   |
| 27.1                | ic       | 28         | 27          | 0.98 | 4.12                            | 0.07581                                   | 10.5 | 0.2401                                    | 6   | 0.0784                                  | 1.2 | 1090 ± 174                                       | 487 ± 18                                        | 56                   |

\*b, bright CL; d, dark CL; c, core; r, rim; o, oscillatory zoned.

Errors are 1σ estimates. All the isotopic compositions were calculated using the <sup>207</sup>Pb common Pb correction method except for <sup>207</sup>Pb\*/<sup>206</sup>Pb\* ratios corrected by <sup>204</sup>Pb. Pb\* denotes radiogenic Pb. Concordance was calculated from <sup>207</sup>Pb/<sup>235</sup>U and <sup>206</sup>Pb/<sup>238</sup>U ages.
